# Supplementary material for: The application of machine learning to predict genetic relatedness using human mtDNA hypervariable region I sequences
Source: PubMed Central journal article supplement (PMC8856515; doi:10.1371/journal.pone.0263790), 2022-02-18
Supplement: pone.0263790.s001.pdf [file pone.0263790.s001.pdf]

| <b>Race Group</b> | <b>Population Group</b> | <b>Predicted Haplogroup</b>        |
|-------------------|-------------------------|------------------------------------|
| <b>African</b>    | Kenyan1                 | N1a(N1a1a)                         |
| <b>African</b>    | Kenyan2                 | M51a(M51a1)                        |
| <b>African</b>    | Kenyan3                 | D5a(D5a3)                          |
| <b>African</b>    | Kenyan4                 | M1a(M1a5)                          |
| <b>African</b>    | Kenyan5                 | R0a(R0a)                           |
| <b>African</b>    | Kenyan6                 | L2a(L2a1)                          |
| <b>African</b>    | Kenyan7                 | M1(M1)                             |
| <b>African</b>    | Kenyan8                 | M1a(M1a1+16093)                    |
| <b>African</b>    | Kenyan9                 | M21b(M21b1a)                       |
| <b>African</b>    | Kenyan10                | R0a(R0a2b)                         |
| <b>African</b>    | Kenyan11                | L3i(L3i2)                          |
| <b>African</b>    | Kenyan12                | L2a(L2a1+143+16189 (16192)+@16309) |
| <b>African</b>    | Kenyan13                | L2a(L2a1+143+16189 (16192)+@16309) |
| <b>African</b>    | Kenyan14                | L3f(L3f1b+16292)                   |
| <b>African</b>    | Kenyan15                | M7c(M7c2a)                         |
| <b>African</b>    | Kenyan16                | M1a(M1a5)                          |
| <b>African</b>    | Kenyan17                | L4b(L4b2)                          |
| <b>African</b>    | Kenyan18                | L0f(L0f2b)                         |
| <b>African</b>    | Kenyan19                | L0d(L0d3b)                         |
| <b>African</b>    | Kenyan20                | L0f(L0f)                           |
| <b>African</b>    | Kenyan21                | I(I)                               |
| <b>African</b>    | Kenyan22                | M73b(M73b)                         |
| <b>African</b>    | Kenyan23                | L4b(L4b2)                          |
| <b>African</b>    | Kenyan24                | L2a(L2a1+16189 (16192))            |
| <b>African</b>    | Kenyan25                | L5b(L5b1)                          |
| <b>African</b>    | Kenyan26                | L2a(L2a4b)                         |
| <b>African</b>    | Kenyan27                | L5b(L5b1)                          |
| <b>African</b>    | Kenyan28                | L3c(L3c)                           |
| <b>African</b>    | Kenyan29                | L3f(L3f1b4a)                       |
| <b>African</b>    | Kenyan30                | L0b(L0b)                           |
| <b>African</b>    | Kenyan31                | L0a(L0a1'4)                        |
| <b>African</b>    | Kenyan32                | L5b(L5b1)                          |
| <b>African</b>    | Kenyan33                | L5a(L5a)                           |
| <b>African</b>    | Kenyan34                | L3c(L3c)                           |
| <b>African</b>    | Kenyan35                | L3f(L3f1b4c)                       |
| <b>African</b>    | Kenyan36                | L0a(L0a)                           |
| <b>African</b>    | Kenyan37                | L0a(L0a2)                          |
| <b>African</b>    | Kenyan38                | L2a(L2a5)                          |
| <b>African</b>    | Kenyan39                | L0a(L0a2)                          |
| <b>African</b>    | Kenyan40                | L4b(L4b2a1)                        |
| <b>African</b>    | Kenyan41                | L0a(L0a1d)                         |
| <b>African</b>    | Kenyan42                | L3e(L3e5)                          |
| <b>African</b>    | Kenyan43                | L0a(L0a1'4)                        |
| <b>African</b>    | Kenyan44                | L0a(L0a1'4)                        |
| <b>African</b>    | Kenyan45                | L3f(L3f1b1a)                       |
| <b>African</b>    | Nigerian1               | L2b(L2b1a)                         |
| <b>African</b>    | Nigerian2               | L2a(L2a1c+16129)                   |
| <b>African</b>    | Nigerian3               | L2a(L2a1)                          |
| <b>African</b>    | Nigerian4               | L3e(L3e2b)                         |

|                |            |                         |
|----------------|------------|-------------------------|
| <b>African</b> | Nigerian5  | L3b(L3b)                |
| <b>African</b> | Nigerian6  | L3d(L3d1c)              |
| <b>African</b> | Nigerian7  | L2a(L2a1)               |
| <b>African</b> | Nigerian8  | L3e(L3e1)               |
| <b>African</b> | Nigerian9  | L4b(L4b1a)              |
| <b>African</b> | Nigerian10 | L2a(L2a1+16189 (16192)) |
| <b>African</b> | Nigerian11 | L3e(L3e3)               |
| <b>African</b> | Nigerian12 | L1c(L1c3b2)             |
| <b>African</b> | Nigerian13 | L3e(L3e2b)              |
| <b>African</b> | Nigerian14 | L3b(L3b)                |
| <b>African</b> | Nigerian15 | L3e(L3e2)               |
| <b>African</b> | Nigerian16 | L0a(L0a1'4)             |
| <b>African</b> | Nigerian17 | L1b(L1b1a1'4)           |
| <b>African</b> | Nigerian18 | L2a(L2a1)               |
| <b>African</b> | Nigerian19 | M51a(M51a1)             |
| <b>African</b> | Nigerian20 | L1c(L1c5)               |
| <b>African</b> | Nigerian21 | L2a(L2a1a2)             |
| <b>African</b> | Nigerian22 | L3f(L3f1b+16292)        |
| <b>African</b> | Nigerian23 | L1b(L1b)                |
| <b>African</b> | Nigerian24 | L2a(L2a1)               |
| <b>African</b> | Nigerian25 | M51a(M51a1)             |
| <b>African</b> | Nigerian26 | L3e(L3e5)               |
| <b>African</b> | Nigerian27 | L3e(L3e2b)              |
| <b>African</b> | Nigerian28 | L3e(L3e5)               |
| <b>African</b> | Nigerian29 | X2(X2+225+@16223)       |
| <b>African</b> | Nigerian30 | L3d(L3d)                |
| <b>African</b> | Nigerian31 | L2a(L2a1d1)             |
| <b>African</b> | Nigerian32 | L2e(L2e)                |
| <b>African</b> | Nigerian33 | L3b(L3b)                |
| <b>African</b> | Nigerian34 | L3d(L3d)                |
| <b>African</b> | Nigerian35 | M51(M51)                |
| <b>African</b> | Nigerian36 | U5b(U5b2a1)             |
| <b>African</b> | Nigerian37 | L3b(L3b1a9a)            |
| <b>African</b> | Nigerian38 | L2a(L2a1a2)             |
| <b>African</b> | Nigerian39 | L3e(L3e3)               |
| <b>African</b> | Nigerian40 | L3e(L3e2)               |
| <b>African</b> | Nigerian41 | M51(M51)                |
| <b>African</b> | Nigerian42 | L1c(L1c3a)              |
| <b>African</b> | Nigerian43 | L3b(L3b)                |
| <b>African</b> | Nigerian44 | L2a(L2a113)             |
| <b>African</b> | Nigerian45 | L1b(L1b)                |
| <b>Asian</b>   | Chinese1   | B5a(B5a)                |
| <b>Asian</b>   | Chinese2   | B5a(B5a)                |
| <b>Asian</b>   | Chinese3   | B4a(B4a4)               |
| <b>Asian</b>   | Chinese4   | B4a(B4a4)               |
| <b>Asian</b>   | Chinese5   | F1b(F1b1a)              |

|              |           |                     |
|--------------|-----------|---------------------|
| <b>Asian</b> | Chinese6  | M7b(M7b1a1+(16192)) |
| <b>Asian</b> | Chinese7  | D4b(D4b2a2a)        |
| <b>Asian</b> | Chinese8  | B4m(B4m)            |
| <b>Asian</b> | Chinese9  | D4j(D4j2)           |
| <b>Asian</b> | Chinese10 | M7b(M7b1a1+(16192)) |
| <b>Asian</b> | Chinese11 | B5b(B5b2)           |
| <b>Asian</b> | Chinese12 | D4o(D4o2a)          |
| <b>Asian</b> | Chinese13 | F2(F2+16291)        |
| <b>Asian</b> | Chinese14 | A7(A7)              |
| <b>Asian</b> | Chinese15 | A2(A2+(64)+@16111)  |
| <b>Asian</b> | Chinese16 | C4c(C4c1b)          |
| <b>Asian</b> | Chinese17 | N9a(N9a)            |
| <b>Asian</b> | Chinese18 | N9a(N9a11)          |
| <b>Asian</b> | Chinese19 | B4h(B4h)            |
| <b>Asian</b> | Chinese20 | M7b(M7b1a)          |
| <b>Asian</b> | Chinese21 | H1f(H1f+16093)      |
| <b>Asian</b> | Chinese22 | D4b(D4b1)           |
| <b>Asian</b> | Chinese23 | R9c(R9c1a)          |
| <b>Asian</b> | Chinese24 | B4(B4)              |
| <b>Asian</b> | Chinese25 | D5a(D5a2a)          |
| <b>Asian</b> | Chinese26 | F1b(F1b)            |
| <b>Asian</b> | Chinese27 | F1a(F1a4a1)         |
| <b>Asian</b> | Chinese28 | M7b(M7b1a1+(16192)) |
| <b>Asian</b> | Chinese29 | M10a(M10a1a1)       |
| <b>Asian</b> | Chinese30 | M7b(M7b1a1+(16192)) |
| <b>Asian</b> | Chinese31 | F1a(F1a1)           |
| <b>Asian</b> | Chinese32 | F1a(F1a1a)          |
| <b>Asian</b> | Chinese33 | M6(M6)              |
| <b>Asian</b> | Chinese34 | C4a(C4a1)           |
| <b>Asian</b> | Chinese35 | M7b(M7b1a1+(16192)) |
| <b>Asian</b> | Chinese36 | B4c(B4c1b)          |
| <b>Asian</b> | Chinese37 | F3a(F3a)            |
| <b>Asian</b> | Chinese38 | M7b(M7b1a1+(16192)) |
| <b>Asian</b> | Chinese39 | F1a(F1a)            |
| <b>Asian</b> | Chinese40 | M76a(M76a)          |
| <b>Asian</b> | Chinese41 | H1a(H1ab1)          |
| <b>Asian</b> | Chinese42 | A2u(A2u1)           |
| <b>Asian</b> | Chinese43 | B5b(B5b2a1)         |
| <b>Asian</b> | Chinese44 | B5a(B5a)            |
| <b>Asian</b> | Chinese45 | A(A)                |
| <b>Asian</b> | Indian1   | I4a(I4a1)           |
| <b>Asian</b> | Indian2   | D4e(D4e1)           |
| <b>Asian</b> | Indian3   | M2a(M2a'b)          |
| <b>Asian</b> | Indian4   | G1b(G1b)            |
| <b>Asian</b> | Indian5   | L3e(L3e2)           |
| <b>Asian</b> | Indian6   | L3h(L3h1)           |

|                  |          |               |
|------------------|----------|---------------|
| <b>Asian</b>     | Indian7  | HV12b(HV12b1) |
| <b>Asian</b>     | Indian8  | HV4a(HV4a)    |
| <b>Asian</b>     | Indian9  | M41a(M41a)    |
| <b>Asian</b>     | Indian10 | W(W)          |
| <b>Asian</b>     | Indian11 | M2a(M2a'b)    |
| <b>Asian</b>     | Indian12 | H5(H5+16311)  |
| <b>Asian</b>     | Indian13 | I4a(I4a1)     |
| <b>Asian</b>     | Indian14 | M5a(M5a2a2)   |
| <b>Asian</b>     | Indian15 | M6a(M6a1b)    |
| <b>Asian</b>     | Indian16 | I(I)          |
| <b>Asian</b>     | Indian17 | M33d(M33d)    |
| <b>Asian</b>     | Indian18 | M2a(M2a1)     |
| <b>Asian</b>     | Indian19 | HV4a(HV4a)    |
| <b>Asian</b>     | Indian20 | U2c(U2c'd)    |
| <b>Asian</b>     | Indian21 | I4a(I4a1)     |
| <b>Asian</b>     | Indian22 | N(N)          |
| <b>Asian</b>     | Indian23 | H15a(H15a1b)  |
| <b>Asian</b>     | Indian24 | M18(M18)      |
| <b>Asian</b>     | Indian25 | L3x(L3x)      |
| <b>Asian</b>     | Indian26 | H1b(H1ba)     |
| <b>Asian</b>     | Indian27 | U2a(U2a)      |
| <b>Asian</b>     | Indian28 | S1(S1)        |
| <b>Asian</b>     | Indian29 | R7a(R7a'b)    |
| <b>Asian</b>     | Indian30 | U2a(U2a)      |
| <b>Asian</b>     | Indian31 | R31b(R31b)    |
| <b>Asian</b>     | Indian32 | L4b(L4b2b1)   |
| <b>Asian</b>     | Indian33 | M54(M54)      |
| <b>Asian</b>     | Indian34 | M2a(M2a1)     |
| <b>Asian</b>     | Indian35 | M6a(M6a1b)    |
| <b>Asian</b>     | Indian36 | U2a(U2a1)     |
| <b>Asian</b>     | Indian37 | M6a(M6a1a)    |
| <b>Asian</b>     | Indian38 | M31a(M31a2)   |
| <b>Asian</b>     | Indian39 | M18(M18)      |
| <b>Asian</b>     | Indian40 | M6a(M6a1a)    |
| <b>Asian</b>     | Indian41 | M6a(M6a1a)    |
| <b>Asian</b>     | Indian42 | E1a(E1a1b2)   |
| <b>Asian</b>     | Indian43 | U2a(U2a)      |
| <b>Asian</b>     | Indian44 | R7a(R7a'b)    |
| <b>Asian</b>     | Indian45 | R7a(R7a'b)    |
| <b>Caucasian</b> | British1 | H5a(H5a4a)    |
| <b>Caucasian</b> | British2 | H5a(H5a4a)    |
| <b>Caucasian</b> | British3 | X(X)          |
| <b>Caucasian</b> | British4 | T1a(T1a)      |
| <b>Caucasian</b> | British5 | T1a(T1a)      |
| <b>Caucasian</b> | British6 | N3(N3)        |
| <b>Caucasian</b> | British7 | H3p(H3p)      |

|                  |           |                    |
|------------------|-----------|--------------------|
| <b>Caucasian</b> | British8  | F4a(F4a)           |
| <b>Caucasian</b> | British9  | F2e(F2e1)          |
| <b>Caucasian</b> | British10 | H10e(H10e)         |
| <b>Caucasian</b> | British11 | X2e(X2e1)          |
| <b>Caucasian</b> | British12 | K2a(K2a11)         |
| <b>Caucasian</b> | British13 | H1(H1+16239)       |
| <b>Caucasian</b> | British14 | P5(P5)             |
| <b>Caucasian</b> | British15 | U5a(U5a1b1)        |
| <b>Caucasian</b> | British16 | R8a(R8a1a1b)       |
| <b>Caucasian</b> | British17 | T2a(T2a1b)         |
| <b>Caucasian</b> | British18 | HV0e(HV0e)         |
| <b>Caucasian</b> | British19 | I(I)               |
| <b>Caucasian</b> | British20 | W1c(W1c1)          |
| <b>Caucasian</b> | British21 | M76(M76)           |
| <b>Caucasian</b> | British22 | W(W)               |
| <b>Caucasian</b> | British23 | H1e(H1e+16129)     |
| <b>Caucasian</b> | British24 | U5a(U5a)           |
| <b>Caucasian</b> | British25 | H2a(H2a+152 16311) |
| <b>Caucasian</b> | British26 | H2a(H2a2a1g)       |
| <b>Caucasian</b> | British27 | N1a(N1a2)          |
| <b>Caucasian</b> | British28 | T1a(T1a)           |
| <b>Caucasian</b> | British29 | T1a(T1a)           |
| <b>Caucasian</b> | British30 | U5b(U5b1b1+@16192) |
| <b>Caucasian</b> | British31 | U5b(U5b1b1+@16192) |
| <b>Caucasian</b> | British32 | H1a(H1a)           |
| <b>Caucasian</b> | British33 | H1a(H1a)           |
| <b>Caucasian</b> | British34 | U5a(U5a1f1)        |
| <b>Caucasian</b> | British35 | U5a(U5a1f1)        |
| <b>Caucasian</b> | British36 | U5a(U5a1+@16192)   |
| <b>Caucasian</b> | British37 | U5a(U5a1+@16192)   |
| <b>Caucasian</b> | British38 | H1a(H1a)           |
| <b>Caucasian</b> | British39 | H1a(H1a)           |
| <b>Caucasian</b> | British40 | T2b(T2b)           |
| <b>Caucasian</b> | British41 | T2b(T2b)           |
| <b>Caucasian</b> | British42 | T2b(T2b)           |
| <b>Caucasian</b> | British43 | H2a(H2a2a1g)       |
| <b>Caucasian</b> | British44 | H2a (H2a2a1g)      |
| <b>Caucasian</b> | British45 | H2a (H2a2a1)       |
| <b>Caucasian</b> | Canadian1 | A2b(A2b1)          |
| <b>Caucasian</b> | Canadian2 | A2b(A2b1)          |
| <b>Caucasian</b> | Canadian3 | A2b(A2b1)          |
| <b>Caucasian</b> | Canadian4 | A2b(A2b1)          |
| <b>Caucasian</b> | Canadian5 | A2b(A2b1)          |
| <b>Caucasian</b> | Canadian6 | D4b(D4b1a2a1)      |
| <b>Caucasian</b> | Canadian7 | A2b(A2b1)          |
| <b>Caucasian</b> | Canadian8 | A2b(A2b1)          |

|                  |            |               |
|------------------|------------|---------------|
| <b>Caucasian</b> | Canadian9  | A2b(A2b1)     |
| <b>Caucasian</b> | Canadian10 | A2b(A2b1)     |
| <b>Caucasian</b> | Canadian11 | A2b(A2b1)     |
| <b>Caucasian</b> | Canadian12 | A2b(A2b1)     |
| <b>Caucasian</b> | Canadian13 | A2a(A2a1)     |
| <b>Caucasian</b> | Canadian14 | D4b(D4b1a2a1) |
| <b>Caucasian</b> | Canadian15 | A2(A2)        |
| <b>Caucasian</b> | Canadian16 | A2b(A2b1)     |
| <b>Caucasian</b> | Canadian17 | A2b(A2b1)     |
| <b>Caucasian</b> | Canadian18 | A2a(A2a1)     |
| <b>Caucasian</b> | Canadian19 | A2b(A2b1)     |
| <b>Caucasian</b> | Canadian20 | A2b(A2b1)     |
| <b>Caucasian</b> | Canadian21 | A2b(A2b1)     |
| <b>Caucasian</b> | Canadian22 | A2b(A2b1)     |
| <b>Caucasian</b> | Canadian23 | A2b(A2b1)     |
| <b>Caucasian</b> | Canadian24 | A2b(A2b1)     |
| <b>Caucasian</b> | Canadian25 | A2b(A2b1)     |
| <b>Caucasian</b> | Canadian26 | A2b(A2b1)     |
| <b>Caucasian</b> | Canadian27 | A2b(A2b1)     |
| <b>Caucasian</b> | Canadian28 | A2b(A2b1)     |
| <b>Caucasian</b> | Canadian29 | A2b(A2b1)     |
| <b>Caucasian</b> | Canadian30 | A2b(A2b1)     |
| <b>Caucasian</b> | Canadian31 | A2b(A2b1)     |
| <b>Caucasian</b> | Canadian32 | A2b(A2b1)     |
| <b>Caucasian</b> | Canadian33 | A2a(A2a1)     |
| <b>Caucasian</b> | Canadian34 | A2b(A2b1)     |
| <b>Caucasian</b> | Canadian35 | A2b(A2b1)     |
| <b>Caucasian</b> | Canadian36 | A2(A2)        |
| <b>Caucasian</b> | Canadian37 | A2b(A2b1)     |
| <b>Caucasian</b> | Canadian38 | A2b(A2b1)     |
| <b>Caucasian</b> | Canadian39 | D4b(D4b1a2a1) |
| <b>Caucasian</b> | Canadian40 | A2b(A2b1)     |
| <b>Caucasian</b> | Canadian41 | A2b(A2b1)     |
| <b>Caucasian</b> | Canadian42 | A2(A2)        |
| <b>Caucasian</b> | Canadian43 | A2b(A2b1)     |
| <b>Caucasian</b> | Canadian44 | A2b(A2b1)     |
| <b>Caucasian</b> | Canadian45 | A2(A2)        |
